# Supplementary material
Source: Springer Nature journal article supplement (https://www.springermedizin.de/resource/supplementary/12889_2007_1098_MOESM2_ESM.pdf/9502446)

White Men

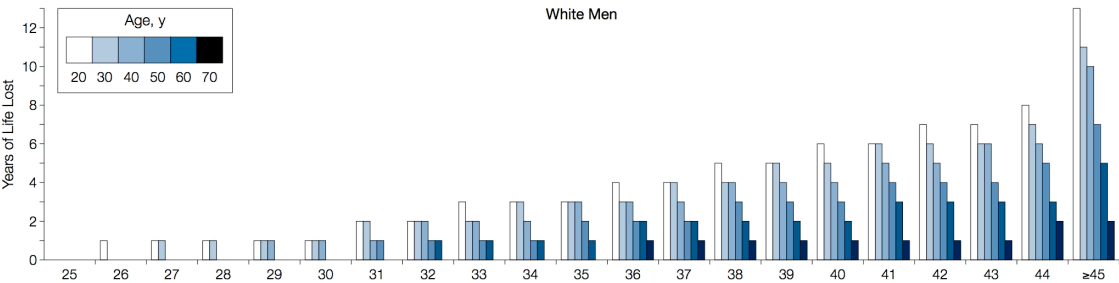

White Women

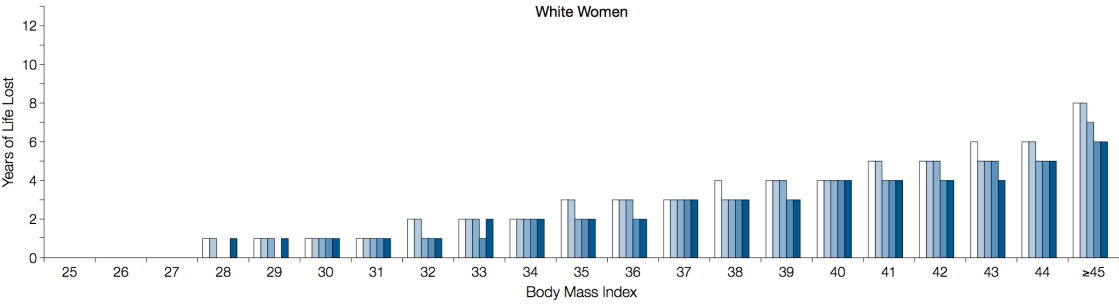

Black Men

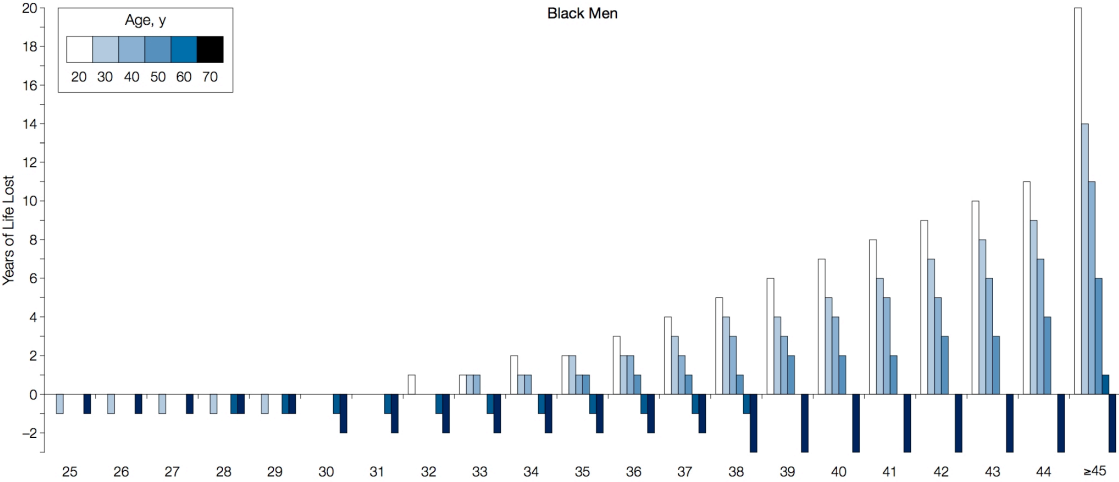

Black Women

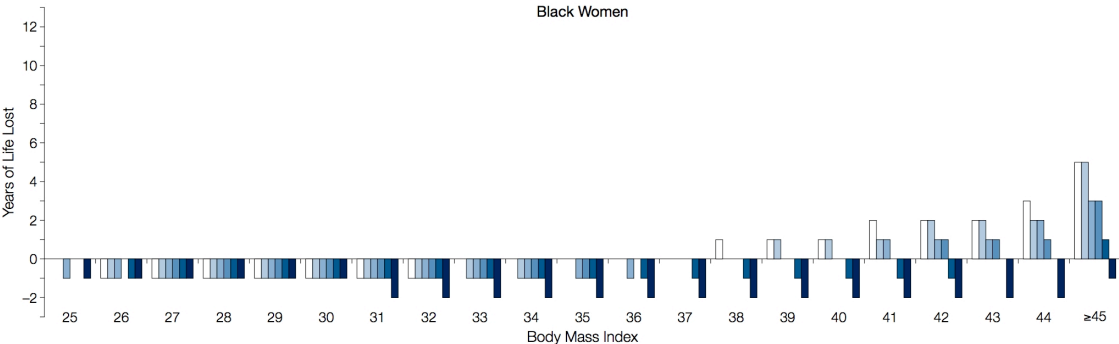

Supplement: MOESM2 [file 9502446]
